# Supplementary material for: Identification of a Common Different Gene Expression Signature in Ischemic Cardiomyopathy
Source: PubMed Central journal article supplement (PMC5793207; doi:10.3390/genes9010056), 2018-01-22
Supplement: genes-09-00056-s001.pdf [file genes-09-00056-s001.pdf]

### **Supplementary Fig.S1 Microarray quality control chart.**

Data after normalization. X-axis: sample; Y-axis: log<sub>2</sub> expression value. Box plot showed the distribution of value data for the samples we selected was median-centered, indicating the data are normalized and cross-comparable. A for GSE5406, B for GSE26887, C for GSE42955 and D for GSE57338.

### **Supplementary Fig.S2 Display of the overview of pathway network from Reactome online.**

Overview of the pathway network of 255 DEGs generated by online Reactome tool. The immune system, signal transduction and metabolism with red circle are the three most enriched categories. Immune system is connected with signal transduction by several pathways.

### **Supplementary Fig.S3 The topology property of the Cytoscape network.**

(A) Degree of distribution; The number of nodes is plotted on y-axis as the node degree on x-axis. The distribution of clustering coefficient decreases as the node degree increases. The number of genes decreased as the node degree increased, reflecting the tendency to contain hub nodes. (B) Average clustering coefficient distribution; The average clustering coefficient is plotted on y-axis as a function of number of neighbours on x-axis. The distribution of clustering coefficient decreases as the node degree increases. The graph exhibits a decreasing tendency of average clustering coefficient as number of neighbours increases. The property follows the power law distribution and suggests a hierarchical organization of the network. (C) neighborhood connectivity distribution; The average neighbourhood connectivity is plotted on y-axis as number of neighbours on x-axis. The chart shows edges between low connected and highly connected nodes prevail in the network. (D) Topological coefficients; The distribution of topological coefficient is plotted on y-axis and the number of neighbours is plotted on x-axis. The graph indicates the tendency of the nodes in the network to have shared neighbors.

### **Supplementary Fig.S4 Network of seven hub genes**

Hub gene located in the center of the network interacted with all the surrounding genes showed. Node size is related to proportional to the edge degree. Edge color suggests the significance according to p value (The brighter the color, the lower the p value). Red node suggests up-regulated genes and blue node suggests down-regulated genes.

**Supplementary Table S1. Baseline information of samples from the four datasets.**

The characteristic of the subjects enrolled in our study is displayed, including: age, sex, the stage of heart failure. Sampling spot and the way of sample preservation and RNA isolation are listed. Con: non-ischemic heart with normal heart function; ICM: ischemic cardiomyopathy; LV: left ventricle; LVEF: left ventricle ejection fraction; NYHA: New York Heart Association (heart function classification). None: no information was available. # $p>0.05$ , there was no significant difference of age between the control and ICM group in GSE 5406. \*  $p<0.05$ , the difference of age between the control and ICM group was statistically significant in GSE26887 and GSE57338.

**Supplementary Table S2. List of the common DEGs of the four datasets.**

255 differentially expressed genes (DEGs) were identified from four profile datasets, including 93 up-regulated genes and 162 down-regulated genes in ICM compared to normal human heart sample. Genes were arranged according to fold change from the largest to the smallest. Genes in bold represent the key DEGs appeared in PPI network.

**Supplementary Table S3. List of DEGs involved in the top ten pathways.**

A number of pathways were significantly enriched in the Reactome network analysis ( $p<0.05$ ). Here we clearly present the 10 most significant pathways, the number of genes involved and the gene symbol.

**Supplementary Table S4. Primer list of DEGs selected for RT-PCR.**

Fig. S1

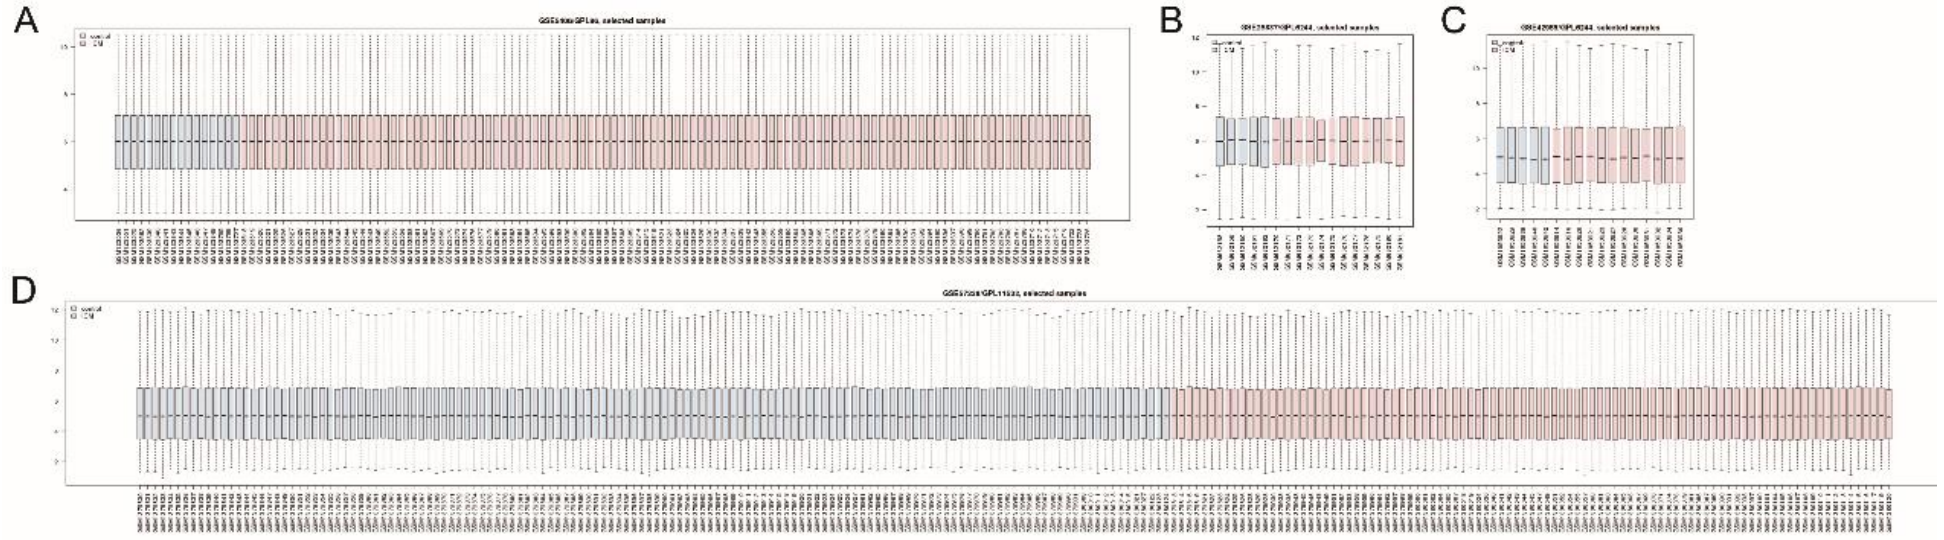

Fig. S2

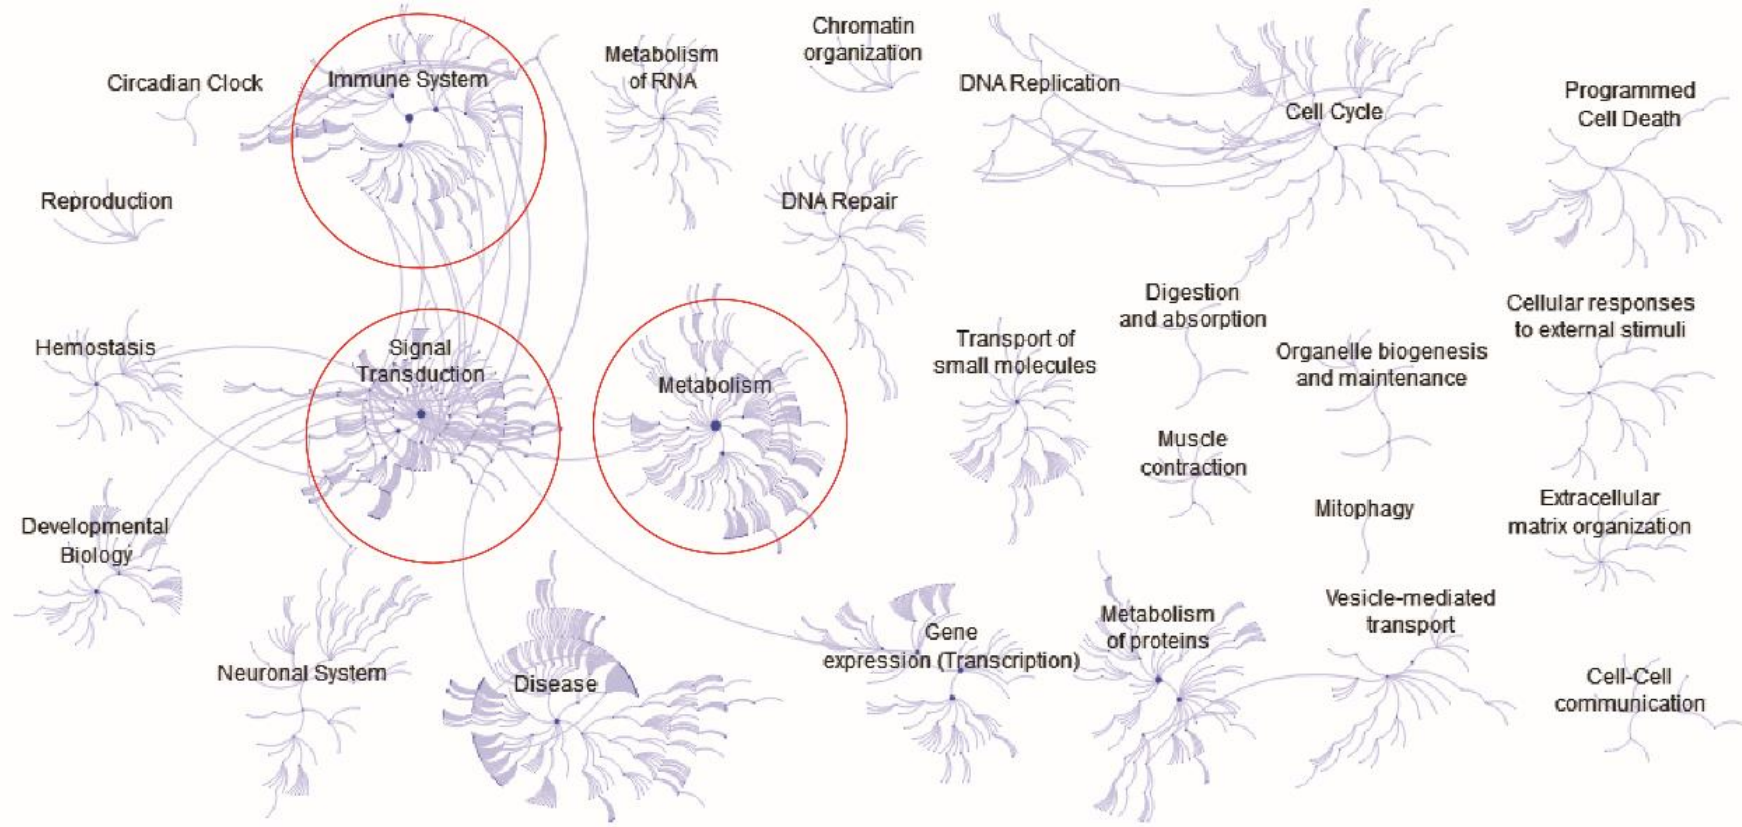

Fig. S3

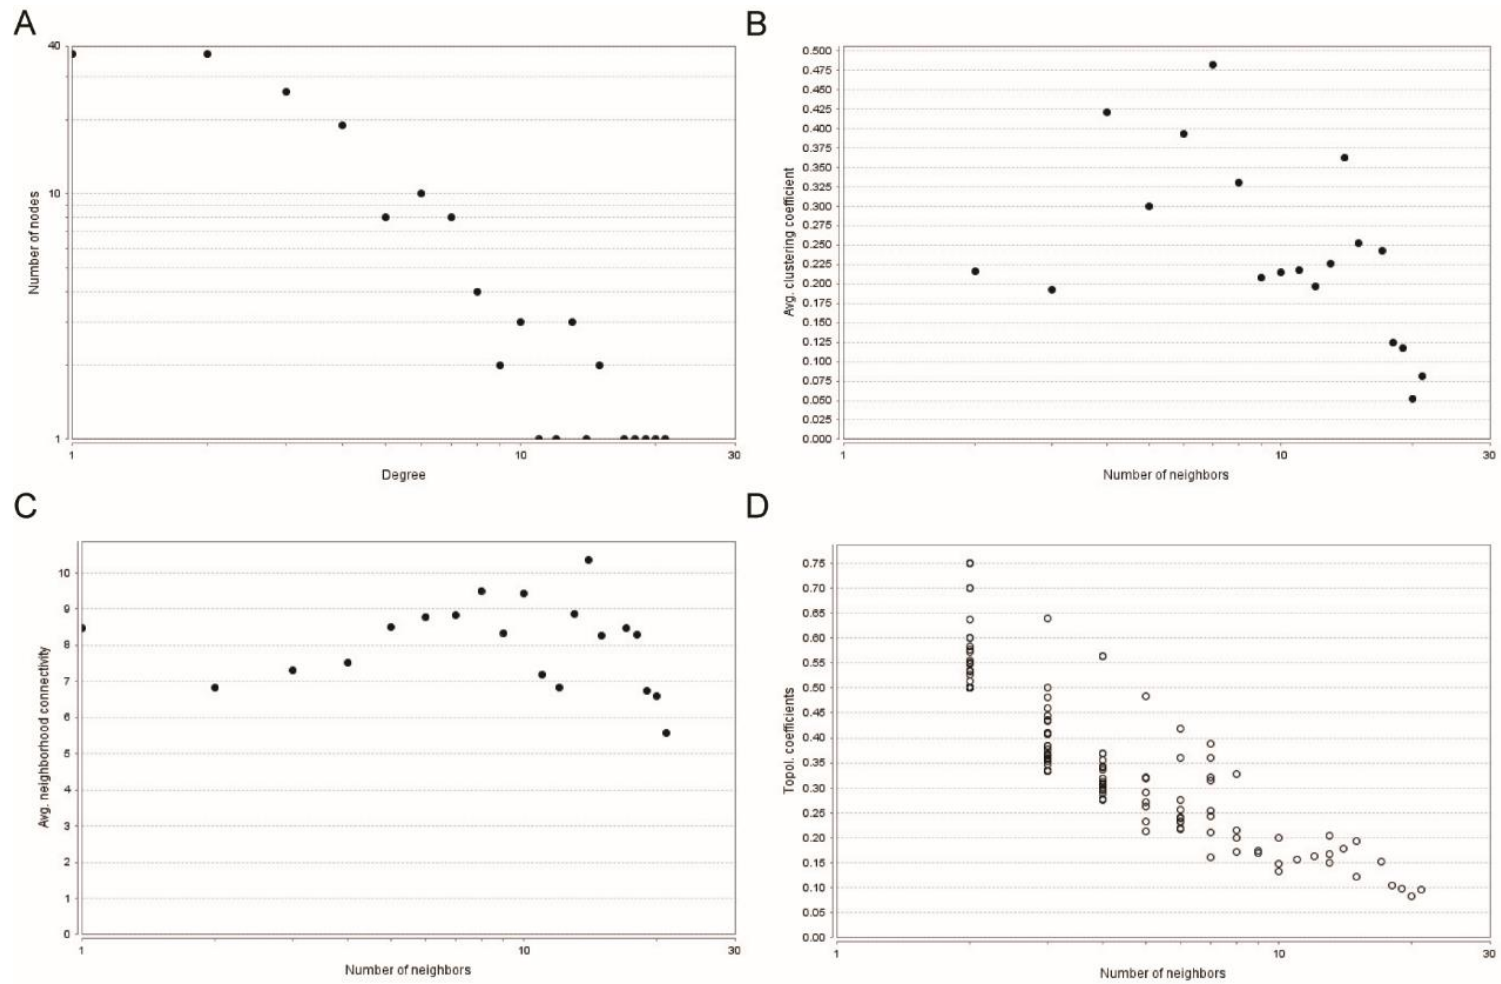

Fig. S4

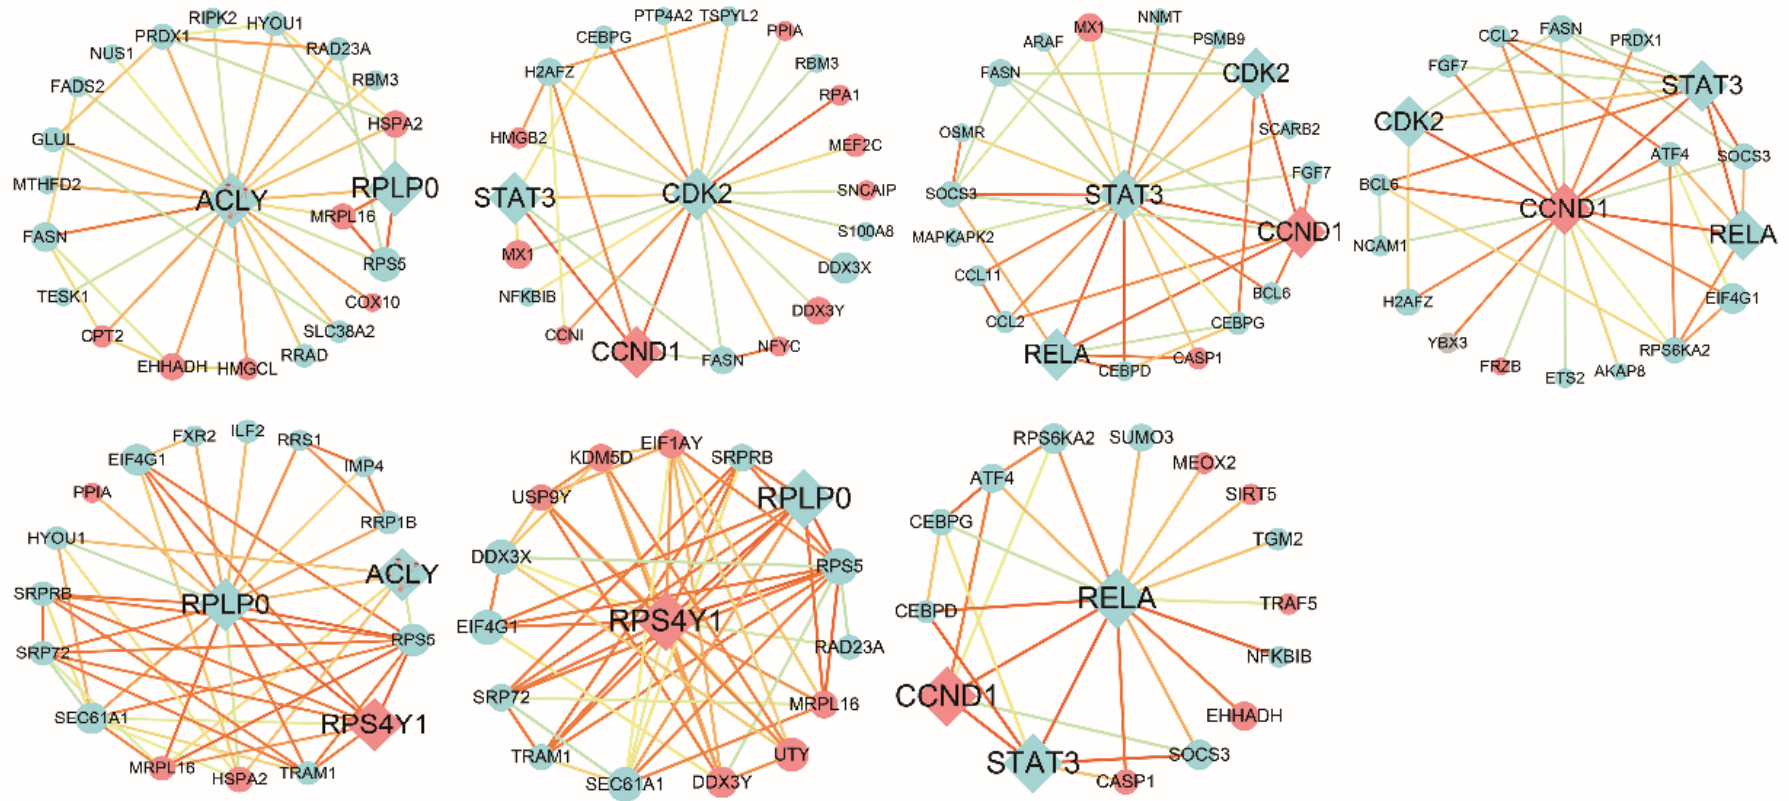

**Table S1**

|          | Number of Samples (n) | Cardiac area                     | Stage of heart failure                   | Age(year)  | Male/female | Sample preservation                                                                                   | RNA isolation                    | Number of DEGs |
|----------|-----------------------|----------------------------------|------------------------------------------|------------|-------------|-------------------------------------------------------------------------------------------------------|----------------------------------|----------------|
| GSE5406  | Con (n=16)            | Non-infarcted LV free wall       | LVEF: 56±7%                              | (54±12)    | None        | snap-frozen in liquid nitrogen                                                                        | Trizol (Invitrogen)              | 3840           |
|          | ICM (n=108)           |                                  | NYHA classIII-IV<br>LVEF: 14±8%          | (57±12) #  | None        |                                                                                                       |                                  |                |
| GSE26887 | Con (n=5)             | LV, vital and non-infarcted zone | normal LV function                       | 48.4±1.2   | 2/3         | snap frozen at -80°C                                                                                  | Trizol (Invitrogen)              | 5639           |
|          | ICM (n=12)            |                                  | LVEF 27.6±1.9                            | 60.4±4.3 * | 12/0        | Samples were immersed in RNAlater (QIAGEN GmbH) and stored at 4°C less than 24h before RNA extraction |                                  |                |
| GSE42955 | Con (n=5)             | The apex of the LV               | normal LV function                       | None       | 5/0         | Stored at -80°C until the RNA extraction                                                              | Qiagen RNeasy Mini kit           | 2137           |
|          | ICM (n=12)            |                                  | None                                     |            | 12/0        |                                                                                                       |                                  |                |
| GSE57338 | Con (n=136)           | LV free-wall tissue              | normal LV function                       | 49.4±1.3   | 74/62       | Stored at -80°C until the RNA extraction                                                              | Qiagen RNeasy total RNA mini kit | 10448          |
|          | ICM (n=95)            |                                  | heart failure undergoing transplantation | 59.1±0.7 * | 81/14       |                                                                                                       |                                  |                |







**Table S3**

| Pathway name                                                | Gene count | p Value | Genes involved                                                                                                                                                                                                                                                                                                                                                                                                                                                                         |
|-------------------------------------------------------------|------------|---------|----------------------------------------------------------------------------------------------------------------------------------------------------------------------------------------------------------------------------------------------------------------------------------------------------------------------------------------------------------------------------------------------------------------------------------------------------------------------------------------|
| Cytokine Signaling                                          | 35         | 0.00035 | <i>IFITM3</i> <i>CCL11</i> <i>CEBPD</i> <i>RPLP0</i> <i>ARAF</i> <i>IFI6</i> <i>FPR1</i> <i>IFIT1</i> <i>RELA</i> <i>RPS6KA2</i> <i>FGF7</i> <i>CCND1</i> <i>SOCS3</i><br><i>CASP1</i> <i>CCL2</i> <i>HLA-DPA1</i> <i>NCAM1</i> <i>TRIM22</i> <i>MTA2</i> <i>IL13RA1</i> <i>IL15RA</i> ; <i>MEF2C</i> <i>RSAD2</i> <i>STAT3</i> <i>MX1</i> ; <i>OSMR</i><br><i>PSMB9</i> <i>BCL6</i> <i>HLA-DPB1</i> <i>HNRNPF</i> <i>MAPKAPK2</i> <i>RIPK2</i> <i>PPIA</i> <i>KPNB1</i> <i>EIF4G1</i> |
| Interleukins Signaling                                      | 25         | 0.00132 | <i>CCL11</i> <i>CEBPD</i> <i>RPLP0</i> <i>ARAF</i> <i>FPR1</i> <i>RELA</i> <i>SOCS3</i> <i>FGF7</i> <i>CCND1</i> <i>RPS6KA2</i> <i>CASP1</i> <i>CCL2</i> <i>NCAM1</i><br><i>MTA2</i> <i>IL13RA1</i> <i>IL15RA</i> <i>MEF2C</i> <i>RIPK2</i> <i>STAT3</i> <i>OSMR</i> <i>PSMB9</i> <i>BCL6</i> <i>HNRNPF</i> <i>MAPKAPK2</i> <i>PPIA</i>                                                                                                                                                |
| Neutrophil degranulation                                    | 16         | 0.01252 | <i>DDX3Y</i> <i>PYGB</i> <i>SERPINA3</i> <i>DDX3X</i> <i>RAB3A</i> <i>AMD1</i> <i>FPR1</i> <i>ILF2</i> <i>ACLY</i> <i>SERPINB1</i> <i>CD59</i> <i>S100A9</i> <i>PPIA</i><br><i>S100A8</i> <i>KPNB1</i> <i>SLC29A1</i>                                                                                                                                                                                                                                                                  |
| Interferon Signaling                                        | 12         | 0.01542 | <i>IFITM3</i> <i>SOCS3</i> <i>HLA-DPA1</i> <i>MX1</i> <i>IFI6</i> <i>NCAM1</i> <i>IFIT1</i> <i>TRIM22</i> <i>KPNB1</i> <i>HLA-DPB1</i> <i>RSAD2</i> <i>EIF4G1</i>                                                                                                                                                                                                                                                                                                                      |
| Unfolded Protein Response (UPR)                             | 8          | 0.00002 | <i>WFS1</i> <i>TSPYL2</i> <i>SEC61A1</i> <i>NFYC</i> <i>SRPRB</i> <i>CCL2</i> <i>HYOU1</i> <i>ATF4</i>                                                                                                                                                                                                                                                                                                                                                                                 |
| SRP-dependent cotranslational protein targeting to membrane | 7          | 0.01941 | <i>TRAM1</i> <i>SEC61A1</i> <i>SRP72</i> <i>RPS5</i> <i>RPLP0</i> <i>SRPRB</i> <i>PS4Y1</i>                                                                                                                                                                                                                                                                                                                                                                                            |
| Cellular Senescence                                         | 7          | 0.03672 | <i>H2AFZ</i> <i>RPS6KA2</i> <i>MAPKAPK2</i> <i>CDK2</i> <i>STAT3</i> <i>ETS2</i> <i>RELA</i>                                                                                                                                                                                                                                                                                                                                                                                           |
| Regulation of cholesterol biosynthesis                      | 6          | 0.00354 | <i>NFYC</i> <i>FASN</i> <i>SEC24D</i> <i>KPNB1</i> <i>TM7SF2</i> <i>ACLY</i>                                                                                                                                                                                                                                                                                                                                                                                                           |
| Toll Like Receptor Cascade                                  | 6          | 0.02007 | <i>MEF2C</i> <i>RPS6KA2</i> <i>MAPKAPK2</i> <i>RIPK2</i> <i>RELA</i> <i>NFKBIB</i>                                                                                                                                                                                                                                                                                                                                                                                                     |
| Senescence-Associated Secretory Phenotype (SASP)            | 5          | 0.01586 | <i>H2AFZ</i> <i>RPS6KA</i> <i>CDK2</i> <i>STAT3</i> <i>RELA</i>                                                                                                                                                                                                                                                                                                                                                                                                                        |

**Table S4.**

Primer list of DEGs selected for RT-PCR.

|         |                         |           |                        |
|---------|-------------------------|-----------|------------------------|
| EIF1AY- | CCCACCTGCTGCATCTTAGTTC  | SERPINA3- | AAAGTCACCAATCCCAAGCAAG |
| EIF1AY- | GCTTCCAATCGTCCATTTCCC   | SERPINA3- | GGATAAGCAGACAGGGCCACAC |
| RPS4Y1- | TCGACAGGTCCCCACAAGC     | MYOT-F    | TTCCCTATTCCTGCCCCTTCC  |
| RPS4Y1- | TGCGGTGAACAGCAAAACG     | MYOT-R    | TGTGCTTGCCTGTCCATCTACC |
| DDX3Y-  | CTCATAAAGCGCAGGCACAC    | CD163-F   | CCCCACAAAAGCCACAACAGG  |
| DDX3Y-  | AAGAACAGGTCCGCAGAAGG    | CD163R    | GCCAACAGAACAACCCCAAGGA |
| USP9Y-  | GAAGAGCCTGCATTCCACATAC  | FCN3-F    | CTGGCTGGGAAATGAGAAT    |
| USP9Y-  | CCACTCACAGCCTCATCCATAA  | FCN3-R    | CGCATAGTGGGCGAAAGTA    |
| UTY-F   | AACTAAGTGGTTGGGAGCGGG   | S100A8-F  | GTTTTTCAGGTGGGGCAAGTC  |
| UTY-R   | CATCTGGGAAACTACAGGGAAGG | S100A8-R  | ACTGAGGACACTCGGTCTCT   |

## References:

1. Zenz, R.; Eferl, R.; Scheinecker, C.; Redlich, K.; Smolen, J.; Schonthaler, H.B.; Kenner, L.; Tschachler, E.; Wagner, E.F. Activator protein 1 (Fos/Jun) functions in inflammatory bone and skin disease. *ARTHRITIS RES THER* **2008**, 10, 201.
2. Roy, A.; Srivastava, M.; Saqib, U.; Liu, D.; Faisal, S.M.; Sugathan, S.; Bishnoi, S.; Baig, M.S. Potential therapeutic targets for inflammation in toll-like receptor 4 (TLR4)-mediated signaling pathways. *INT IMMUNOPHARMACOL* **2016**, 40, 79-89.
3. Ishihara, S.; Schwartz, R.H. Two-step binding of transcription factors cause sequential chromatin structural changes at the activated IL-2 promoter. *J IMMUNOL* **2011**, 187, 3292-3299.
4. Thurlings, I.; de Bruin, A. E2F Transcription factors control the roller coaster ride of cell cycle gene expression. *Methods Mol Biol* **2016**, 1342, 71-88.
5. DeGregori, J.; Johnson, D.G. Distinct and overlapping roles for E2F family members in transcription, proliferation and apoptosis. *CURR MOL MED* **2006**, 6, 739-748.
6. Carvajal, L.A.; Hamard, P.J.; Tonnessen, C.; Manfredi, J.J. E2F7, a novel target, is up-regulated by p53 and mediates DNA damage-dependent transcriptional repression. *Genes Dev* **2012**, 26, 1533-1545.
7. Schoneveld, O.J.; Gaemers, I.C.; Lamers, W.H. Mechanisms of glucocorticoid signalling. *Biochim Biophys Acta* **2004**, 1680, 114-128.
8. Wu, B.; Wang, Y.; Wang, C.; Wang, G.G.; Wu, J.; Wan, Y.Y. BPTF is essential for T cell homeostasis and function. *J IMMUNOL* **2016**, 197, 4325-4333.
9. Hetz, C. The unfolded protein response: controlling cell fate decisions under ER stress and beyond. *Nat Rev Mol Cell Biol* **2012**, 13, 89-102.
10. Usui, M.; Yamaguchi, S.; Tanji, Y.; Tominaga, R.; Ishigaki, Y.; Fukumoto, M.; Katagiri, H.; Mori, K.; Oka, Y.; Ishihara, H. Atf6 $\alpha$ -null mice are glucose intolerant due to pancreatic  $\beta$ -cell failure on a high-fat diet but partially resistant to diet-induced insulin resistance. *METABOLISM* **2012**, 61, 1118-1128.
11. Roychoudhuri, R.; Hirahara, K.; Mousavi, K.; Clever, D.; Klebanoff, C.A.; Bonelli, M.; Sciume, G.; Zare, H.; Vahedi, G.; Dema, B.; et al. BACH2 represses effector programs to stabilize T<sub>reg</sub>-mediated immune homeostasis. *NATURE* **2013**, 498, 506-510.
12. Bernard, P.; Sim, H.; Knowler, K.; Vilain, E.; Harley, V. Human *SRY* inhibits  $\beta$ -catenin-mediated transcription. *Int J Biochem Cell Biol* **2008**, 40, 2889-2900.
13. Cowan, J.; Tariq, M.; Ware, S.M. Genetic and functional analyses of *ZIC3* variants in congenital heart disease. *HUM MUTAT* **2014**, 35, 66-75.
14. Qiao, Y.; Giannopoulou, E.G.; Chan, C.H.; Park, S.H.; Gong, S.; Chen, J.; Hu, X.; Elemento, O.; Ivashkiv, L.B. Synergistic activation of inflammatory cytokine genes by interferon-gamma-induced chromatin remodeling and toll-like receptor signaling. *IMMUNITY* **2013**, 39, 454-469.
15. Harikumar, K.B.; Yester, J.W.; Surace, M.J.; Oyeniran, C.; Price, M.M.; Huang, W.C.; Hait, N.C.; Allegood, J.C.; Yamada, A.; Kong, X.; et al. K63-linked polyubiquitination of transcription factor IRF1 is essential for IL-1-induced production of chemokines CXCL10 and CCL5. *NAT IMMUNOL* **2014**, 15, 231-238.
